# Supplementary material for: Holocene paleoceanography of the Northeast Greenland shelf
Source: Copernicus journal article supplement (doi:10.5194/cp-2021-59), 2021-06-02
Supplement: Supplementary file [file cp-2021-59-AC2-supplement.pdf]

Referee 2

The paper by Pados-Dibattista et al presents new data from a remote site at the northeastern Greenland shelf aiming to reconstruct variability of climate and ocean conditions during the Holocene. The topic is within the scope of the journal and the presented data are new and results are very interesting. The paper is generally well written but has some aspects in the results and the discussion (see below) which need to be improved before the final publication. I recommend publication after major revisions given that authors can address the criticism detailed below.

We thank the reviewer for their valuable comments, which have been important for improving the manuscript and we have done our best to take into account. In a few instances, we have chosen a different solution to an issue pointed out by the reviewer; in those cases, we provide explanations to this under each comment below.

### Major comments:

1. During the review I counted about 30 (!) abbreviations present in the paper and was often struggling with finding what those mean throughout the text. I suggest to the authors to make it easier for the reader, compile a list of all abbreviations used in the paper and present it in the beginning or alternatively at the end of the paper. This will facilitate finding them all in one place if needed.

The reviewer is correct that too many abbreviations are tiring. We have thus removed the abbreviations that were not repeated many times in the manuscript (PSW, AIW, NEW, NØIB, WSC). Moreover, as suggested, we added the list of remaining abbreviations (10) to the supplementary material.

2. Results section regarding foraminiferal analysis needs to be re-written starting with presenting a general information about foraminifera (this is present for planktonic but currently is missing for benthic ones). Such info shall include which benthic species were dominant (e.g. >10%), accessory (e.g. 5-10%) and rare (e.g. <5%). Then go into details regarding how many were calcareous vs how many were agglutinated and so on. The authors often write “the most abundant species” but it is unclear what they mean by those – dominant or accessory? This should be clarified.

The use of “dominant”, “accessory”, and “rare” was previously common when describing assemblages. However, most often this is omitted today, as we provide actual data on relative frequencies instead. However, we have now added these to the descriptions, where relevant.

3. The authors shall also add figures with absolute abundances because relative abundances can sometimes be misleading as they are usually not normalized per sample weight or sample volume. There are some sort of graphs present in the appendices, and although those look a bit different, they still have % instead of ind/g – if those are supposed to represent ind./g they shall be moved to the general text and be present alongside with % data instead of appendices.

The reviewer is correct that as relative frequencies are a closed sum, these calculations do not always tell if a % of a species increases just because other species decrease, and not because the first species is decreasing in abundance. However, relative abundances are in fact the data always used in interpretations and comparisons in palaeoceanographic studies, and we thus need to keep this figure. However, we have now added figures also on the foraminiferal species as individuals/g wet sediment to the supplementary material (Fig. A4 and A5); these figures will allow any reader test for actual changes in the individual species.

4. The authors should run some kind of multivariate statistics to strengthen their visual ecozone subdivision. A simple cluster analysis combined with PCA or Factor analysis would help here to verify if changes in the assemblages are significant enough to define ecozones. For instance, in results (p10, line 53) the authors define ecozone II based on appearance of *bulloides* in the record. This species, however, is present in very low abundances (<1%) and it is important to show with statistical analyses that its presence makes significant changes in the assemblages.

Some benthic foraminiferal species are highly sensitive to environmental changes, while others are more robust. Often the robust species dominate assemblages, while the rarer species may be the ones that are really important for palaeoceanographic and palaeoclimatic reconstructions. In these cases, multivariate statistics are not the best option for defining ecological changes, as it will never catch these more subtle but defining changes. This is the case here. Although it is understandable that the reviewer wonders about the significance that we place on *Pullenia bulloides*, its presence even in low numbers is highly important showing an un-usually high influx of Atlantic Water. Thus, it is here necessary to use this visual method for defining the zonation.

5. All ecozones are labelled in a strange manner e.g. “345-310 cm or 9.4-8.2 ka” – this should be changed to “310-345 cm or 8.2-9.4 ka” to make it more logical. Similar changes should be made all over in the text where authors refer to time periods or core intervals.

Thank you for your comment. However, it is common (see e.g., Moros et al., 2006; Jennings et al., 2011; Consolaro et al., 2018; Zehnich et al., 2020) and logical to describe and discuss a sediment core from the bottom (past) towards the top (present). Our text and thus the core depth and the age of the intervals follow this concept.

6. In addition to age, core depth should be added to all foram graphs to make it easier to follow the text and connection to the age model.

Good point. We added core depth to all of the foraminiferal graphs.

Also the width of the horizontal axis for the abundance data needs to be adjusted based on high (wide axis) or low (narrow axis) numbers – now all x-axis on graphs have the same width, but different range values, which makes it misleading for the reader

Thank you for your comment. The x axes have the same width because the ranges that they show (in some case 0-8, in some case 0-200) do not make it possible to have the same unit-length, and still present all data in one single figure. We believe that it is very important that all this data is shown in one single figure in order to compare them and understand easily the changes that happen through time. Moreover, this is a standard mode of presenting benthic foraminiferal data. In the figure caption the readers are warned about that “the x-axes have different scaling”.

7. Section 5 (p11, lines 96-113) is way too long and contains a lot of text which belongs to the discussion. Here the authors shall only keep information about foram groupings they used for interpretation later– like suggested below. All remaining information including interpretation shall be moved to the discussion. A much shorter section 5 can include the following: Atlantic Water group includes x, y, z species (Refs); Chilled Atlantic Water group - x, y, z species (Refs); Arctic Water group ....S feylingi....Some agglutinated species have been described in connection with particular water masses (refs) and we use those to reconstruct...

We agree that this section would better fit into the discussion. We have now moved the paragraph to the discussion and, in addition, we have shortly listed the groups in the methods. Note that the move of the text to the discussion is not marked in yellow in the track changes version of the manuscript, as this would mask the other changes made this paragraph.

8. Section 6.2.1 (p13) shall be removed from the discussion as the authors say in the methods (p6, lines 190-19) that this section was not considered in the interpretation.

Thank you for your comment. We have now deleted the prior comment that the section is not discussed. We also removed the following sentence from the results: “This latter assemblage we interpret as reworked from older deposits.”, as this is an interpretation not belonging in the Results section.

9. My last major point is about the discussion section, where the authors present their own data (section 6.2) separately from other studies (sections 6.3 and 6.4), which both shall be intertwined. So, the discussion needs to be rewritten.

Each paragraph in the discussion chapter 5.3 start with a short environmental interpretation of the data from our own core. It is necessary first to provide an environmental interpretation before discussing its significance. We chose to combine this environmental interpretation with the broader discussion in order to both avoid repetitions and make the links clearer. However, we did keep the short interpretation in a separate subsection, in order to clearly separate, which part of the discussion is based on our new study, and which is based on comparison to previous studies.

The last two paragraphs of the discussion (5.4 and 5.5) place our results in an even broader context, but here we have now added more references to our own data.

#### **Minor comments:**

Abstract:

P1, Line 9: “We carried out benthic foraminiferal...” - This sentence jumps a bit abrupt from one topic to another. Start instead by saying “In order to reconstruct the variability of the East Greenland Current and general paleoceanographic conditions in the area during the Holocene, we carried out benthic foraminiferal assemblage, stable isotope- and sedimentological analyses etc...”

Corrected.

Introduction:

P1, Line 25: “According to model simulations, the Arctic Ocean may become seasonally ice-free as early as 2040-2050 (Stroeve 25 et al., 2012). However, despite the extreme societal and environmental relevance of this sea-ice reduction...” – please add a sentence or two explaining what these “extreme societal and environmental” implications are, and then introduce to the public the lack of knowledge on the topic.

We added a sentence.

Regional setting

P3, lines 83-85: Please remove abbreviations 79NG and ZI as those are only relevant of figure caption to Fig.1. Also please mark all “abbreviated” features (SS, ZI, 79NG, NQIB) on the Figure 1 with the arrows to better indicate their position on the map.

We removed the abbreviations, and we added Northeast Greenland Ice Stream with arrows showing towards the glacier outlets to the map.

P3, line 85: Please spell out 79NG and ZI.

Corrected.

Methods:

P5, lines 148-150: “A minimum of 300 benthic specimens were identified for each sample, except for four samples (10-11 cm, 15-16 cm, 30-31 cm, 195-196 cm). These four samples contained only between 242-296 specimens – I suggest authors removing the part about samples where 300 ind count was not reached. It is a well-known fact now that despite 300 ind/ sample is a standard procedure (e.g. Murray, 2006) counting individuals less than that can still produce statistically significant results (see e.g. Fatela & Taborda, 2002. Mar. Micropal. 45, 169-174).

We have now deleted the sentence “These data were, therefore, treated with some caution, but they were still included in the calculations for relative and absolute abundances”.

However, we believe that it is important to note, which samples did not reach the 300 specimens and also that the number was in fact not significantly below the 300 individuals.

P5, line 157: “..was restricted by the number of available, clearly identifiable tests...” – what does this mean? Not corroded and well preserved individuals? Please explain.

We mean with this sentence that only individuals were picked for stable isotope analysis that were with no doubt belonging to the species *Elphidium clavatum*. We omitted tests that raised any questions, in order to get the best possible results. However, in order to make it clear, we have added “without any corrosion or non-typical shapes” to the sentence.

Results:

P6, line 174: “The sediment of the lowest 40 cm of the core is much coarser...” - it was mentioned in the methods that the authors did IRD analysis but that one is completely forgotten in the results and the discussion. Please add this information there.

Thank you for your comment. In the results, in chapter 4.1 (Core description) we write that our (low-resolution) IRD analysis revealed that between ca. 0-370 cm the sand fraction is on average 1.5%, without any significant changes that could be discussed. In the last 40 cm of the record, which probably contains reworked sediments and thus we omitted from further analysis, the sand fraction rises to 51%. These results are shown in Fig. 3. However, to make it more clear, we have now added that “in the rest of the core... the clay : silt : sand ratio does not show any significant changes”.

P6, Figure 3: Please mark all available 14C dates close to the timescale.

Done.

P8, line 210: Please change the title to “Foraminiferal analysis” instead of “Foraminiferal content”

Corrected.

P8, line 211: Please change the title to “Redeposited core section 345-410 cm with Plio/Pleistocene Foraminifera” –Also I suggest the authors to swap the places for sections 4.4.1 and 4.4.2 and focus first on the core part which shows the main results. Then you can mention that the core base contains x,y,z forams, is likely redeposited, and is therefore excluded from interpretation.

Thank you for your comment. However, we believe that in the results section we cannot specify yet that this part of the core is redeposited, because the results serve as a plain description of the foraminiferal content, and adding “redeposited” to the title already presents an interpretation.

Moreover, the order of chapters follow the core description principle “from the bottom to the top i.e. oldest to youngest”.

P8, line 219: Please change to “The Holocene core section 0-345 cm”. Also consider swapping places with section 4.4.1 to present your most important findings first.

Please see the comment above regarding presentation of data and discussions from oldest to youngest.

P8, line 223 – p9, line 239: This section needs to be re-written.

- Start with presenting foram concentrations as range (x-y) with an average z. Do this for both planktonics and benthics (calcareous and agglutinated separately). As it looks now, sometimes ranges are given but averages are missing, or the other way around. Please be consistent and present both all the time.

Thank you for your comment. We have now added concentration ranges and averages of species where relevant. However, we believe that it would make the results unnecessary long and not easily readable, if we would add ranges and averages to all species. Changes in abundances relative to the entire benthic assemblage and relative to the calcareous/agglutinate assemblage, supplemented with concentration changes (ind. /g sediment) are shown on Figs. 5, 6, A2, A3, A4, A5.

- Continue by telling which species were dominant, accessory and rare for each foram group (planktonics and benthics). Here, try to be consistent with spelling out species names fully every time they appear for the first time in a new section.

The use of “dominant”, “accessory”, and “rare” was previously common when describing assemblage. However, most often this is omitted today, as we provide actual data on relative frequencies instead. However, we have now added these to the descriptions, where relevant. Moreover, in order to keep the article shorter, we wrote out the full species names just at the first time they are mentioned in the manuscript. However, if the editor prefers us to always write out the species names in full, we are glad to do it so.

P8, line 230: “...from this point...” – which point? Please specify.

Changed to “from 210 cm until the top of the record”.

P8, line 232: “..the most abundant..” – what does this mean? Dominant? Accessory? If so what range and averages this species has?

Please see our comment above about the categories “dominant”, “accessory” and “rare”. Moreover, the average abundances are stated in the same sentence: “the most abundant benthic agglutinated species are *Portatrochammina bipolaris*, followed by *Ammoglobogerina globigeriniformis*, representing on average 42 % and 16 % (respectively) of the benthic agglutinated assemblage, and 27.5 % and 10.5 % of the total benthic assemblage. They are both continuously present throughout the core and their relative abundances do not show strong fluctuations”.

P8, line 233-234: “...representing on average 42 % and 16 % (respectively) of the benthic agglutinated assemblage, and 27.5 % and 10.5 % of the total benthic assemblage. “ – information about their percentage within the agglutinated assemblage is irrelevant, please remove it and keep only % of the entire assemblage.

Thank you for your comment. However, we believe that it is important to show these species' percentages within the agglutinated assemblage too, hence figure A3 in the supplement.

P8, line 236: “The most abundant..” – see comment above

Please see our comment above about the categories “dominant”, “accessory” and “rare”.

P8, line 237: Spell out *C. reniforme* and *E. clavatum*

Thank you for the comment, but they have been spelled out earlier (see chapter 4.4.1.), and in order to be consistent, we only spell out full species names once. Should the editor wish differently, we can of course easily add the full species names.

P9, lines 242-243, Figure 5 caption: “The depicted species were chosen in order to show changes in the environment.” – this is vague and unclear. I assume those are changes in water masses such as...., if yes please specify.

Corrected and changed to “water masses”.

Also please add core depth in cm to this graph, adjust axis width so it reflects the abundances visually and add a graph with respective changes for absolute abundances of those species.

We added core depth to the graph, however we cannot adjust the axis width; see our comment above, at major comment 6.

P9, lines 247-249: “..ecozones that were defined by visual interpretation of the species abundances” – please add here “within 0-345 cm core depth”.

We added “in the dated section of the core (345-0 cm core depth)”.

P9, line 250: please change the title to “Ecozone I. (310-345 cm; ca. 8.2-9.4 ka BP)”. Do similar changes with swopping the ages and core depths so they appear in right order everywhere in the text.

Please see our comment about the order of age range and core depth above, at major comment 5.

P9, line 254: add “(unshown)” after the “agglutinated/calcareous ratio”

Done.

P9, line 256-258: “The benthic calcareous assemblage is dominated by *C. reniforme* (relative abundance on average 14 %), followed by *S. horvathi* (on average 12 %), *E. clavatum* (on average 11 %) and *C. neoteretis* (on average 9 %).” – where there any important accessory species?

In order to keep the results short and easily readable, we refer from naming all the species that are present in a certain interval. We mention only the species that are important regarding our environmental interpretation. For more details, please see Fig. 5 and 6 and the raw data.

P10, line 259: see my comment above regarding swopping the ages and core depths

Please see our comment about the order of age range and core depth above, at major comment 5.

P10, line 267: “..species *Adercotryma glomerata* significantly increases from 310 cm...” – based on figure 6 I cannot see any “significant” increase in *A glomerata* no matter how hard I try! So, I suggest to the authors to tone down this by removing word “significant” or to adjust the scale on *A glomerata* graph so it shows only 0-15% range with occasional peaks shown by axis break.

Corrected and removed “significantly”.

P10: Figure 6 – please add core depth and adjust axis width so it reflects the abundances visually. Also add a graph with respective changes for absolute abundances of those species.



Thank you for your comment. We added the core depth to Fig. 5 and 6, however we cannot adjust the axis width; see our comment above, at major comment 6.

P10, line 273: see my comment above regarding swopping the ages and core depths  
Please see our comment about the order of age range and core depth above, at major comment 5.

P10, lines 275: “rises dramatically” – an increase from 1 to 7 % is not a dramatic increase. Please tone this statement down or change to “comes back to higher numbers”.  
Corrected and removed “dramatically”.

P10, lines 276-277: please add “Being present in abundances below 2% in ecozones I and II” to “Epistominella arctica increases...” Also remove “while the relative abundances of *A. glomerata* decrease” – as this is not visible from the Fig 6 as it looks now!

Thank you for your comment. It is clearly stated that *E. arctica* “increases (from 0.4 % (previous interval) to 0.8 %)”; but now we have added a short sentence pointing out that the species is still only present in low numbers. Moreover, we believe that the decrease of *A. glomerata* from ecozone II to ecozone III is visible from Fig. 6. In either case, the decrease is clearly present in the raw data and it is an important information to mention due to the ecological significance of these species.

P10, line 278: see my comment above regarding swopping the ages and core depths in the title.

Please see our comment about the order of age range and core depth above, at major comment 5.

P10, line 279: please remove word “drastic”. There are several instances in the record where calcareous benthics decrease but those are not mentioned.

Thank you for your comment. However, the benthic calcareous species continuously decrease from ecozone I to ecozone V, and we mentioned this at the beginning of the description of every interval. Ecozone II: “we can recognize a distinctive decrease in planktic and benthic calcareous foraminiferal concentration”; ecozone III: “The concentrations of planktic and benthic calcareous foraminifera continue to decrease...” ecozone IV: “The base of this ecozone is defined by the drastic decrease in benthic calcareous foraminiferal concentrations...”

P10, line 280: “...and increased relative abundances of *E. arctica* and *Stainforthia feylingi*.” - Based on fig 5, *S. feylingi* has abundances quite similar to zones I and II but is not mentioned at all in the description of those.

Thank you for your comment. We mention certain species in the results when they show changes that could refer to significant environmental changes (also, relative to other species). In order to keep the results short and easily readable, we refer to mention the abundances of every species in every interval.

P11, line 282: “..agglutinated species *A. glomerata* shows a drastic peak at the beginning of this ecozone.” – not just *A. glomerata* but also *R. fusiformis* does the same and is worth mentioning here. Please add.

Added *R. fusiformis*.

P11, line 283: “..*Spiroplectammina biformis* increase significantly compared to the previous interval.” – please consider changing to “*Spiroplectammina biformis* starts to increase as compared to the previous ecozones.

Corrected.

P11, line 284: see my comment above regarding swapping the ages and core depths in the title.

Please see our comment about the order of age range and core depth above, at major comment 5.

P 11, line 288: “*Saccamina difflugiformis* shows a steep rise unique to this interval” – this species again has been present in other ecozones as well but is completely ignored in the description of those. Why?

Thank you for your comment. We mention certain species in the results when they show changes that could refer to significant environmental changes (also, relative to other species). In order to keep the Results short and easily readable, we refer to mention the abundances of every species in every interval.

P11, lines 296-313: This section needs to be completely rewritten and moved to the methods (see suggestion below). Note that all information containing interpretation needs to be moved to the discussion. You may want to keep the following information (copy pasted from the MS) and move that to the Methods rather than keeping this in the results:

“In order to be able to describe the changes in water masses over time on the NE Greenland shelf, we place selected benthic calcareous foraminifera species into groupings that are based on environmental preferences of the species (Table A2 in appendices). *The Atlantic Water group* includes *C. neoteretis* and *P. bulloides* (e.g., Mackensen and Hald, 1988; Seidenkrantz 1995; Rytter et al., 2002; Jennings et al., 2004; 300 Jennings et al., 2011; Cage et al., 2021). *The chilled Atlantic Water group* includes *I. norcrossi* and *M. barleeanum* (e.g., Slubowska-Woldengen et al., 2007; Perner et al., 2011; Perner et al., 2015; Cage et al., 2021). *The Arctic Water group* includes *S. horvathi* and *E. arctica* (e.g., Green, 1960; Lagoe, 1979; Wollenburg and Mackensen, 305 1998; Jennings et al, 2020). *Stainforthia feylingi* is used here as a sea-ice edge indicator species that tolerates unstable conditions (Knudsen and Seidenkrantz, 1994; Seidenkrantz, 2013); its increase may refer to the location of a sea-ice margin at the study site. Moreover, we use in the interpretation the abundances of the agglutinated species *A. glomerata*, *T. earlandi*, *T. torquata*, *S. biformis* and *S. difflugiformis*, as those have been linked to specific water masses in the Arctic (e.g., Hald and Korsun, 1997; Jennings and Helgadottir, 1994; Korsun and Hald, 2000; Lloyd 2006; Perner et al., 2012; Perner et al., 2015, Wangner et al., 2018).

We agree that this section would better fit into the discussion. We have now moved the paragraph to the discussion. In addition, we have shortly listed the groups in the methods.

Discussion:

P12, lines 324-325: Please change: “the temperature profile” to “CTD profile”, “not exceeding” to “below” and “closer in character to that” to “closer in character to the water”

Corrected.

P13, line 326: please change “the site” to “our study site” and “but may also be due to wind-driven upwelling” to “but may also be present due to wind-driven upwelling

Corrected.



P13, lines 332-338: This section needs to be removed – see my major comment 7.  
Please see our comment above, at major comment 8.

P13, line 339: please change “9.4-8.2” to 8.2-9.4”  
Please see our comment about the order of age range and core depth above, at major comment 5.

P13, line 340: Before jumping into the discussion, you need to lead to it first based on what your data show. E.g. start with saying something like “ The AMS 14C dating places this core interval into the early Holocene, which based on our data and previous studies (Refs) is suggested to be dominated by colder climate conditions over the study site. This cold interval was characterized by....”  
Deleted “cold”.

P13, line 342: “Atlantic water indicator species” – please add “such as” and list those. Also change “points to” to “suggests”.  
Corrected and added.

P13, line 349: please change “was also characterised” to “was also likely characterised”  
Corrected.

P13, line 350: please add “and” between “foraminifera” and “the presence of *E. arctica*”  
Thank you for your comment, however there was already an “and” at the end of the listing: “...foraminifera, the presence of *E. arctica*, which thrives in high-productivity environments (Wollenburg and Kuhnt, 2000) **and** a pronounced peak in Ca/Fe ratio...”. However, we have now divided up the sentence to prevent any misunderstanding.

P14, line 370: please change “8.2-6.2” to “6.2-8.2”  
Please see our comment about the order of age range and core depth above, at major comment 5.

P14, lines 373-375: “*C. neoteretis* and *A. glomerata* had their highest relative abundances during this interval...and *P. bulloides* appeared in the record after a long absence around 8 ka BP (Figs. 5 and 6), suggesting highly stable bottom waters (Rytter et al., 2002).” “ - please spell out *C. neoteretis* fully or change to “Species *C. neoteretis*” (this applies to all species names at the start of a new sentence, as it is not correct to start a new sentence with an abbreviation).  
Corrected.

Also abundances of *A. glomerata* in zone II are not much higher than in zone 5, associated with Neoglaciatio, so please change the statement about its highest abundances.  
Thank you for your comment. The reviewer is correct that the abundances of *A. glomerata* in ecozone II are not much higher than in ecozone V, however, this does not change the fact that *A. glomerata* still has its highest abundances in ecozone II.

As for *P. bulloides* – see my comment regarding its abundances <1%. The authors should discuss this and run a multivariate statistical analysis to see if this assemblage change is significant or not and add a discussion regarding this in the text.

Please see our comment about the statistics above, at major comment 4.

P14, line 388: “..on the ME and SE Greenland shelf...” – what does abbreviation ME stands for? Please explain.

Corrected and added Middle East and South East.

P14, line 391: please change “6.2-4.2” to “4.2-6.2” in the title

Please see our comment about the order of age range and core depth above, at major comment 5.

P15, line 407: please change “4.2-3.2” to “3.2-4.2” in the title

Please see our comment about the order of age range and core depth above, at major comment 5.

P15, line 431: please change “3.2-0.3” to “0.3-3.2”

Please see our comment about the order of age range and core depth above, at major comment 5.

Sections 6.3 and 6.4: This sections solely focus on findings of the others instead of putting own data into perspective of other studies. I suggest to move these sections to the introduction where they more naturally belong in their present form, otherwise the authors shall make an effort in answering the question how their own data fit into other studies they give an overview to herein. Go back to your aim. What are your data telling you about dynamics of the water masses you aimed to reconstruct? E.g. was EGC weaker or stronger? What does this mean for AMOC and climate in the Arctic (based on other studies)? What are future implications of those changes (again based on other studies)? As for now the authors treat their own data separately from other studies and this makes the last two sections look a bit off place giving a feeling that those shall be moved to the introduction or included in a review paper on the topic.

The last two paragraphs of the discussion (5.4 and 5.5) place our results in a broader context. However, here we have now added more references to our own data to emphasize how our data fits in the context.

Conclusions:

This section contains too much information in its present form and is difficult to read due to its bullet-point structure. I suggest condensing conclusions, to present the most essential findings, again linking back to the hypothesis, aim and motivation of the study.

Thank you for your comment. However, this is a matter of personal writing style and we think that exactly the bullet-point structure makes the conclusions easily understandable and quick to read-through. Unfortunately, we cannot reduce the information shown here, as we wrote only one – max. two sentences about each interval/topic.
